# Supplementary material for: Nuclear Export of Pre-Ribosomal Subunits Requires Dbp5, but Not as an RNA-Helicase as for mRNA Export
Source: PubMed Central journal article supplement (PMC4752221; doi:10.1371/journal.pone.0149571), 2016-02-12
Supplement: pone.0149571.s013.pdf [file pone.0149571.s013.pdf]

**S1 Table. *Saccharomyces cerevisiae* strains used in this study.**

| Strain number | Genotype                                                                                                                                                                              | Source                      |
|---------------|---------------------------------------------------------------------------------------------------------------------------------------------------------------------------------------|-----------------------------|
| HKY36         | <i>MAT<math>\alpha</math> ura3-52 leu2<math>\Delta</math>1 his3<math>\Delta</math>200</i>                                                                                             | [1]                         |
| HKY40         | <i>MAT ura3-1 leu2-3 trp1-1 his3-11 ade2-1 xpo1::LEU2</i><br>+ <i>pCEN XPO1 HIS3</i>                                                                                                  | [2]                         |
| HKY41         | <i>MAT<math>\alpha</math> ura3-1 leu2-3 trp1-1 his3-11 ade2-1 can1-1 xpo1::LEU2</i><br>+ <i>pCEN xpo1-1 HIS3</i>                                                                      | [2]                         |
| HKY90         | <i>MAT<math>\alpha</math> ura2 leu2 rat8-1</i>                                                                                                                                        | this study,<br>based on [3] |
| HKY93         | <i>MAT<math>\alpha</math> ura3-1 leu2-3,112 his3-11 ade2-1 gle1-4</i>                                                                                                                 | [4]                         |
| HKY124        | <i>MAT<math>\alpha</math> ura3-52 leu2<math>\Delta</math>1 his3<math>\Delta</math>200 rat7-1</i>                                                                                      | [5]                         |
| HKY128        | <i>MAT<math>\alpha</math> ura3-52 leu2<math>\Delta</math>1 trp1<math>\Delta</math>63 his3<math>\Delta</math>200 rat8::HIS3</i><br>+ <i>pCEN rat8-3 LEU2</i>                           | [3]                         |
| HKY129        | <i>MAT<math>\alpha</math> ura3-52 leu2<math>\Delta</math>1 trp1<math>\Delta</math>63 his3<math>\Delta</math>200 rat8::HIS3</i><br>+ <i>pCEN rat8-7 LEU2</i>                           | [3]                         |
| HKY130        | <i>MAT<math>\alpha</math> ura3-52 leu2<math>\Delta</math>1 trp1<math>\Delta</math>63 rat8-2</i>                                                                                       | [3]                         |
| HKY206        | <i>MAT<math>\alpha</math> ura3-1 leu2-3 trp1-1 his3-11 ade2-1 can1-1 xpo1::Leu2</i><br>+ <i>pCEN xpo1-1 TRP1</i>                                                                      | [6]                         |
| HKY276        | <i>MAT<math>\alpha</math> ade2 his3 leu2 trp1 ura3</i>                                                                                                                                | [7]                         |
| HKY314        | <i>MAT<math>\alpha</math> ura3<math>\Delta</math>0 leu2<math>\Delta</math>0 his3<math>\Delta</math>1 met15<math>\Delta</math>0</i>                                                    | Euroscarf                   |
| HKY381        | <i>MAT<math>\alpha</math> ura3<math>\Delta</math>0 leu2<math>\Delta</math>0 his3<math>\Delta</math>1 lys2<math>\Delta</math>0</i>                                                     | Euroscarf                   |
| HKY456        | <i>MAT<math>\alpha</math> ura3-52 leu2<math>\Delta</math>1 trp1<math>\Delta</math>63 his3<math>\Delta</math>200 rat8::HIS3</i><br>+ <i>p 2<math>\mu</math> RAT8 URA3</i>              | this study                  |
| HKY462        | <i>MAT<math>\alpha</math> ura3-52 leu2<math>\Delta</math>1 rpb1-1 rat8-2</i>                                                                                                          | this study                  |
| HKY734        | <i>MAT<math>\alpha</math> ura3<math>\Delta</math>0 leu2<math>\Delta</math>0 his3<math>\Delta</math>1 lys2<math>\Delta</math> mtr2::kanMX4</i><br>+ <i>pCEN mtr2-33 LEU2</i>           | this study                  |
| HKY863        | <i>MAT<math>\alpha</math> ura3<math>\Delta</math>0 leu2<math>\Delta</math>0 his3<math>\Delta</math>1 lys2<math>\Delta</math> rpl10::kanMX4</i><br>+ <i>pCEN rpl10(G161D)-GFP URA3</i> | [8]                         |
| HKY892        | <i>MAT<math>\alpha</math> ura3 leu2 trp1 his3 ade2 mtr2::HIS3</i><br>+ <i>pCEN mtr2-33 TRP1 + pCEN MTR2 URA3</i>                                                                      | [9]                         |
| HKY894        | <i>MAT<math>\alpha</math> ura3 leu2 trp1 his3 lys2 nmd3::kanMX4</i><br>+ <i>pCEN nmd3-2 TRP1 + pCEN NMD3 URA3</i>                                                                     | [9]                         |
| HKY1071       | <i>MAT<math>\alpha</math> ura3 leu2 trp1 ade2 lys2 gle1-2</i>                                                                                                                         | [10]                        |
| HKY1242       | <i>MAT<math>\alpha</math> ura3<math>\Delta</math>0 leu2<math>\Delta</math>0 his3<math>\Delta</math>1 met15<math>\Delta</math>0 RAT8::GFP::HIS3MX6X</i>                                | Invitrogen                  |
| HKY1356       | <i>MAT<math>\alpha</math> ura3 leu2 trp1 his3 nmd3::kanMX4 rat8::HIS3</i><br>+ <i>p 2<math>\mu</math> RAT8 URA3 + pCEN nmd3-2 TRP1 + pCEN NMD3 URA3</i>                               | this study                  |
| HKY1369       | <i>MAT<math>\alpha</math> ura3 leu2 trp1 his3 lys2 mtr2::kanMX4 rat8::HIS3</i><br>+ <i>pCEN rat8-3 LEU2 + pCEN MTR2 URA3</i>                                                          | this study                  |
| HKY1370       | <i>MAT<math>\alpha</math> ura3 leu2 his3</i>                                                                                                                                          | this study                  |
| HKY1371       | <i>MAT<math>\alpha</math> ura3 leu2 trp1 his3 lys2 rat8::HIS3</i><br>+ <i>pCEN rat8-3 LEU2</i>                                                                                        | this study                  |
| HKY1372       | <i>MAT<math>\alpha</math> ura3 leu2 his3 mtr2::kanMX4</i><br>+ <i>pCEN mtr2-33 LEU2 + pCEN MTR2 URA3</i>                                                                              | this study                  |
| HKY1377       | <i>MAT<math>\alpha</math> ura3<math>\Delta</math>0 leu2<math>\Delta</math>0 his3<math>\Delta</math>1 met15<math>\Delta</math>0 XPO1::GFP::HIS3MX6X</i>                                | Invitrogen                  |
| HKY1379       | <i>MAT<math>\alpha</math> ura3<math>\Delta</math>0 leu2<math>\Delta</math>0 his3<math>\Delta</math>1 met15<math>\Delta</math>0 RIO2::GFP::HIS3MX6X</i>                                | Invitrogen                  |
| HKY1493       | <i>MAT<math>\alpha</math> ade2 ura3-0 his3-1 leu2-0 trp1 drg1-18</i>                                                                                                                  | [11]                        |
| HKY1646       | <i>MAT<math>\alpha</math> ura3-52 leu2<math>\Delta</math>1 trp1<math>\Delta</math>63 his3<math>\Delta</math>200 rat7<math>\Delta</math>N(1-500)</i>                                   | [12]                        |

## Supplemental References

1. Winston F, Dollard C, Ricupero-Hovasse SL. Construction of a set of convenient *Saccharomyces cerevisiae* strains that are isogenic to S288C. *Yeast*. 1995;11(1):53-5. Epub 1995/01/01. doi: 10.1002/yea.320110107. PubMed PMID: 7762301.

2. Stade K, Ford CS, Guthrie C, Weis K. Exportin 1 (Crm1p) is an essential nuclear export factor. *Cell*. 1997;90(6):1041-50. Epub 1997/10/10. doi: S0092-8674(00)80370-0 [pii]. PubMed PMID: 9323132.
3. Snay-Hodge CA, Colot HV, Goldstein AL, Cole CN. Dbp5p/Rat8p is a yeast nuclear pore-associated DEAD-box protein essential for RNA export. *EMBO J*. 1998;17(9):2663-76. Epub 1998/06/20. doi: 10.1093/emboj/17.9.2663. PubMed PMID: 9564048; PubMed Central PMCID: PMC1170607.
4. Murphy R, Wentz SR. An RNA-export mediator with an essential nuclear export signal. *Nature*. 1996;383(6598):357-60. Epub 1996/09/26. doi: 10.1038/383357a0. PubMed PMID: 8848052.
5. Del Priore V, Heath C, Snay C, MacMillan A, Gorsch L, Dagher S, et al. A structure/function analysis of Rat7p/Nup159p, an essential nucleoporin of *Saccharomyces cerevisiae*. *J Cell Sci*. 1997;110 ( Pt 23):2987-99. Epub 1998/02/07. PubMed PMID: 9359887.
6. Taura T, Krebber H, Silver PA. A member of the Ran-binding protein family, Yrb2p, is involved in nuclear protein export. *Proc Natl Acad Sci U S A*. 1998;95(13):7427-32. Epub 1998/06/24. PubMed PMID: 9636166; PubMed Central PMCID: PMC22639.
7. Zenklusen D, Vinciguerra P, Strahm Y, Stutz F. The yeast hnRNP-Like proteins Yra1p and Yra2p participate in mRNA export through interaction with Mex67p. *Mol Cell Biol*. 2001;21(13):4219-32. Epub 2001/06/08. doi: 10.1128/MCB.21.13.4219-4232.2001. PubMed PMID: 11390651; PubMed Central PMCID: PMC87083.
8. Baierlein C, Hackmann A, Gross T, Henker L, Hinz F, Krebber H. Monosome formation during translation initiation requires the serine/arginine-rich protein Npl3. *Mol Cell Biol*. 2013;33(24):4811-23. Epub 2013/10/09. doi: 10.1128/MCB.00873-13 [pii]. PubMed PMID: 24100011; PubMed Central PMCID: PMC3889561.
9. Bassler J, Grandi P, Gadal O, Lessmann T, Petfalski E, Tollervey D, et al. Identification of a 60S preribosomal particle that is closely linked to nuclear export. *Mol Cell*. 2001;8(3):517-29. Epub 2001/10/05. doi: S1097-2765(01)00342-2 [pii]. PubMed PMID: 11583615.
10. Bolger TA, Folkmann AW, Tran EJ, Wentz SR. The mRNA export factor Gle1 and inositol hexakisphosphate regulate distinct stages of translation. *Cell*. 2008;134(4):624-33. Epub 2008/08/30. doi: S0092-8674(08)00779-4 [pii] 10.1016/j.cell.2008.06.027. PubMed PMID: 18724935; PubMed Central PMCID: PMC2601711.
11. Zakalskiy A, Hogenauer G, Ishikawa T, Wehrschutz-Sigl E, Wendler F, Teis D, et al. Structural and enzymatic properties of the AAA protein Drg1p from *Saccharomyces cerevisiae*. Decoupling of intracellular function from ATPase activity and hexamerization. *J Biol Chem*. 2002;277(30):26788-95. Epub 2002/05/15. doi: 10.1074/jbc.M201515200. PubMed PMID: 12006565.
12. Scarcelli JJ, Hodge CA, Cole CN. The yeast integral membrane protein Apq12 potentially links membrane dynamics to assembly of nuclear pore complexes. *J Cell Biol*. 2007;178(5):799-812. Epub 2007/08/29. doi: 10.1083/jcb.200702120. PubMed PMID: 17724120; PubMed Central PMCID: PMC2064545.
