# Supplementary material for: Nuclear Export of Pre-Ribosomal Subunits Requires Dbp5, but Not as an RNA-Helicase as for mRNA Export
Source: PubMed Central journal article supplement (PMC4752221; doi:10.1371/journal.pone.0149571), 2016-02-12
Supplement: pone.0149571.s014.pdf [file pone.0149571.s014.pdf]

**S2 Table. Plasmids used in this study.**

| Plasmid number | Features                                                               | Source        |
|----------------|------------------------------------------------------------------------|---------------|
| pHK20          | <i>CEN MEX67-GFP LEU2</i>                                              | [1]           |
| pHK43          | <i>CEN XPO1-GFP URA3</i>                                               | [2]           |
| pHK86          | <i>CEN TRP1</i>                                                        | [3]           |
| pHK87          | <i>CEN LEU2</i>                                                        | [3]           |
| pHK88          | <i>CEN URA3</i>                                                        | [3]           |
| pHK258         | <i>2<math>\mu</math> P<sub>GAL1</sub>CBP80-GFP URA3</i>                | [4]           |
| pHK284         | <i>CEN MTR2 URA3</i>                                                   | [1]           |
| pHK636         | <i>2<math>\mu</math> P<sub>GAL</sub>MYC-DBP5 LEU2</i>                  | this study    |
| pHK638         | <i>CEN rat8-3 LEU2</i>                                                 | [5]           |
| pHK653         | <i>CEN GFP-DBP5 URA3</i>                                               | [6]           |
| pHK655         | <i>CEN GFP-rat8-2 LEU2</i>                                             | [6]           |
| pHK666         | <i>CEN GFP-DBP5 LEU2</i>                                               | this study    |
| pHK697         | <i>CEN RPS2-GFP URA3</i>                                               | [7]           |
| pHK698         | <i>CEN RPL25-GFP URA3</i>                                              | [8]           |
| pHK706         | <i>CEN mtr2-33 TRP1</i>                                                | [9]           |
| pHK707         | <i>CEN mtr2-33 LEU2</i>                                                | [9]           |
| pHK720         | <i>CEN NMD3-13xmyc LEU2</i>                                            | [10]          |
| pHK724         | <i>CEN NMD3-GFP URA3</i>                                               | [11]          |
| pHK789         | <i>CEN ARX1-GFP URA3</i>                                               | this study    |
| pHK1288        | pGEX-6P-1 (expression plasmid for GST)                                 | GE Healthcare |
| pHK1289        | pGEX-6P-1-DBP5 (expression plasmid for GST-Dbp5)                       | this study    |
| pHK1349        | <i>CEN RPL11B-GFP URA3</i>                                             | this study    |
| pHK1372        | pProEX-1-MTR2-RBS-MEX67<br>(expression plasmid for His-Mtr2 and Mex67) | [12]          |
| pHK1398        | <i>2<math>\mu</math> P<sub>GAL</sub>dbp5-R369G LEU2</i>                | [13]          |
| pHK1399        | <i>2<math>\mu</math> P<sub>GAL</sub>dbp5-R426Q LEU2</i>                | [13]          |
| pHK1508        | <i>2<math>\mu</math> P<sub>GAL</sub>dbp5-E240Q LEU2</i>                | [13]          |
| pHK1509        | <i>2<math>\mu</math> P<sub>GAL</sub>dbp5-K144Q LEU2</i>                | [13]          |

## Supplemental References

1. Santos-Rosa H, Moreno H, Simos G, Segref A, Fahrenkrog B, Pante N, et al. Nuclear mRNA export requires complex formation between Mex67p and Mtr2p at the nuclear pores. *Mol Cell Biol.* 1998;18(11):6826-38. Epub 1998/10/17. PubMed PMID: 9774696; PubMed Central PMCID: PMC109266.
2. Stade K, Ford CS, Guthrie C, Weis K. Exportin 1 (Crm1p) is an essential nuclear export factor. *Cell.* 1997;90(6):1041-50. Epub 1997/10/10. doi: S0092-8674(00)80370-0 [pii]. PubMed PMID: 9323132.
3. Sikorski RS, Hieter P. A system of shuttle vectors and yeast host strains designed for efficient manipulation of DNA in *Saccharomyces cerevisiae*. *Genetics.* 1989;122(1):19-27. Epub 1989/05/01. PubMed PMID: 2659436; PubMed Central PMCID: PMC1203683.
4. Shen EC, Stage-Zimmermann T, Chui P, Silver PA. The yeast mRNA-binding protein Npl3p interacts with the cap-binding complex. *J Biol Chem.* 2000;275(31):23718-24. Epub 2000/05/24. doi: 10.1074/jbc.M002312200. PubMed PMID: 10823828.

5. Snay-Hodge CA, Colot HV, Goldstein AL, Cole CN. Dbp5p/Rat8p is a yeast nuclear pore-associated DEAD-box protein essential for RNA export. *EMBO J.* 1998;17(9):2663-76. Epub 1998/06/20. doi: 10.1093/emboj/17.9.2663. PubMed PMID: 9564048; PubMed Central PMCID: PMC1170607.
6. Gross T, Siepmann A, Sturm D, Windgassen M, Scarcelli JJ, Seedorf M, et al. The DEAD-box RNA helicase Dbp5 functions in translation termination. *Science.* 2007;315(5812):646-9. Epub 2007/02/03. doi: 315/5812/646 [pii] 10.1126/science.1134641. PubMed PMID: 17272721.
7. Milkereit P, Strauss D, Bassler J, Gadal O, Kuhn H, Schutz S, et al. A Noc complex specifically involved in the formation and nuclear export of ribosomal 40 S subunits. *J Biol Chem.* 2003;278(6):4072-81. Epub 2002/11/26. doi: 10.1074/jbc.M208898200. PubMed PMID: 12446671.
8. Gadal O, Strauss D, Kessel J, Trumpower B, Tollervey D, Hurt E. Nuclear export of 60s ribosomal subunits depends on Xpo1p and requires a nuclear export sequence-containing factor, Nmd3p, that associates with the large subunit protein Rpl10p. *Mol Cell Biol.* 2001;21(10):3405-15. Epub 2001/04/21. doi: 10.1128/MCB.21.10.3405-3415.2001. PubMed PMID: 11313466; PubMed Central PMCID: PMC100262.
9. Bassler J, Grandi P, Gadal O, Lessmann T, Petfalski E, Tollervey D, et al. Identification of a 60S preribosomal particle that is closely linked to nuclear export. *Mol Cell.* 2001;8(3):517-29. Epub 2001/10/05. doi: S1097-2765(01)00342-2 [pii]. PubMed PMID: 11583615.
10. Ho JH, Kallstrom G, Johnson AW. Nmd3p is a Crm1p-dependent adapter protein for nuclear export of the large ribosomal subunit. *J Cell Biol.* 2000;151(5):1057-66. Epub 2000/11/22. PubMed PMID: 11086007; PubMed Central PMCID: PMC2174350.
11. Hedges J, West M, Johnson AW. Release of the export adapter, Nmd3p, from the 60S ribosomal subunit requires Rpl10p and the cytoplasmic GTPase Lsg1p. *EMBO J.* 2005;24(3):567-79. Epub 2005/01/22. doi: 7600547 [pii] 10.1038/sj.emboj.7600547. PubMed PMID: 15660131; PubMed Central PMCID: PMC548654.
12. Yao W, Roser D, Kohler A, Bradatsch B, Bassler J, Hurt E. Nuclear export of ribosomal 60S subunits by the general mRNA export receptor Mex67-Mtr2. *Mol Cell.* 2007;26(1):51-62. Epub 2007/04/17. doi: S1097-2765(07)00118-9 [pii] 10.1016/j.molcel.2007.02.018. PubMed PMID: 17434126.
13. Hodge CA, Tran EJ, Noble KN, Alcazar-Roman AR, Ben-Yishay R, Scarcelli JJ, et al. The Dbp5 cycle at the nuclear pore complex during mRNA export I: dbp5 mutants with defects in RNA binding and ATP hydrolysis define key steps for Nup159 and Gle1. *Genes Dev.* 2011;25(10):1052-64. Epub 2011/05/18. doi: 25/10/1052 [pii] 10.1101/gad.2041611. PubMed PMID: 21576265; PubMed Central PMCID: PMC3093121.
