# Supplementary material for: Nuclear Export of Pre-Ribosomal Subunits Requires Dbp5, but Not as an RNA-Helicase as for mRNA Export
Source: PubMed Central journal article supplement (PMC4752221; doi:10.1371/journal.pone.0149571), 2016-02-12
Supplement: pone.0149571.s015.pdf [file pone.0149571.s015.pdf]

**S3 Table. Oligonucleotides used in this study.**

| Oligo number | Sequence                                                               | Target                                         |
|--------------|------------------------------------------------------------------------|------------------------------------------------|
| HK558        | 5'-tcc <b>CCGCGG</b> TGGGCTTCTCTAGCTC-3'                               | <i>ARX1</i> forward<br>( <b>SacII</b> site)    |
| HK562        | 5'-GTTCTCCAGTGAG-3'                                                    | <i>ARX1</i> reverse                            |
| HK974        | 5'- <b>taatacgactcactataggg</b> GCTTAAGTTCAGCGGGTACTCCTACC-3'          | <i>RDN25</i> reverse<br>( <b>T7 promoter</b> ) |
| HK1138       | 5'-AGGTAGGAGTACCCGCTGAA-3'                                             | <i>RDN25</i> forward                           |
| HK1139       | 5'- <b>taatacgactcactataggg</b> ATGGAATTTACCACCCACTTAGAGC-3'           | <i>RDN25</i> reverse<br>( <b>T7 promoter</b> ) |
| HK1140       | 5'-GTGAAACTGCGAATGGCTCATTAAAT-3'                                       | <i>RDN18</i> forward                           |
| HK1141       | 5'- <b>taatacgactcactataggg</b> AATCGAACCTTATTCCCCGTTA-3'              | <i>RDN18</i> reverse<br>( <b>T7 promoter</b> ) |
| HK1485       | 5'-tat <b>CCGCGG</b> TGCCCAAGTCAAGCCTAC-3'                             | <i>RPL11B</i> forward<br>( <b>SacII</b> site)  |
| HK1486       | 5'-cta <b>CTCGAG</b> cTTTATCGAGCACATCAGCG-3'                           | <i>RPL11B</i> reverse<br>( <b>XhoI</b> site)   |
| HK1723       | 5'-CGAGCCGTTTATGTCCAACG-3'                                             | <i>LSR1</i> forward                            |
| HK1724       | 5'- <b>taataggactcactatagg</b> GCCGATACTTGGGGGATAAG-3'                 | <i>LSR1</i> reverse<br>( <b>T7 promoter</b> )  |
| HK1893       | 5'-GTAGGTGAACCTGCGGAAGG-3'                                             | <i>RDN18</i> forward                           |
| HK1894       | 5'- <b>taatacgactcactataggg</b> GCACAGAAATCTCTCACCGTTG-3'              | <i>ITS1</i> reverse<br>( <b>T7 promoter</b> )  |
| HK1895       | 5'-GCCTGTTTGAGCGTCATTTCTTCTC-3'                                        | <i>RDN5.8/ITS2</i><br>forward                  |
| HK2200       | 5'-GAACAGGACGTCATAGAGGGTGAGAATCCC<br>GTGTGGCGAGGAGTGCGGTT[Cyanine3]-3' | <i>RDN25</i> probe                             |
